# Supplementary material for: Secondary organic aerosols from anthropogenic volatile organic compounds contribute substantially to air pollution mortality
Source: Copernicus journal article supplement (doi:10.5194/acp-21-11201-2021), 2021-07-27
Supplement: Supplementary file [file acp-21-11201-2021-supplement-title-page.pdf › acp-21-11201-2021-supplement-title-page.pdf]

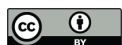

## *Supplement of*

# **Secondary organic aerosols from anthropogenic volatile organic compounds contribute substantially to air pollution mortality**

**Benjamin A. Nault et al.**

*Correspondence to:* Benjamin A. Nault (bnault@aerodyne.com) and Jose L. Jimenez (jose.jimenez@colorado.edu)

- [acp-21-11201-2021-supplement-title-page.pdf](#)
- Supplement
  - [2020-11-02\\_GBD\\_Parameters.csv](#)
  - [2021-06-26\\_Megacity\\_ASOA\\_ACP\\_Clean\\_for\\_ACPD\\_SI.pdf](#)

The copyright of individual parts of the supplement might differ from the article licence.
